# Supplementary material
Source: Springer Nature journal article supplement (https://www.springermedizin.de/resource/supplementary/12955_2012_1021_MOESM1_ESM.pdf/9558586)
Supplement: MOESM1 [file 9558586]

## Enrollment

Assessed for eligibility (n=202)

Excluded (n=152)

- ◆ Not meeting inclusion criteria (n=115)
- ◆ Declined to participate (n=37)

Randomized (n=50)

## Allocation

Allocated to intervention (n=25)

- ◆ Received allocated intervention (n=25)

Allocated to traditional intervention (n=25)

- ◆ Received allocated intervention (n=25)

## Follow-up

Lost to follow-up (n=0)

Lost to follow-up:

Relocated to another center (n=1)

Underwent transplantation (n=1)

## Analysis

Analyzed (n=25)

- ◆ Excluded from analysis (n=0)

Analyzed (n=23)

- Lost to follow-up (n=2)
